# Supplementary material for: A gain-of-function Bushy dwarf tiller 1 mutation in rice microRNA gene miR156d caused by insertion of the DNA transposon nDart1
Source: PubMed Central journal article supplement (PMC4585910; doi:10.1038/srep14357), 2015-09-25
Supplement: srep14357-s1.pdf [file srep14357-s1.pdf]

## Supplementary Data

### A gain-of-function *Bushy dwarf tiller 1* mutation in rice microRNA gene *miR156d* caused by insertion of the DNA transposon *nDart1*

Mika Hayashi-Tsugane<sup>1,4</sup>, Masahiko Maekawa<sup>2</sup>, and Kazuo Tsugane<sup>1,3,\*</sup>

<sup>1</sup>National Institute for Basic Biology, Okazaki 444-8585, Japan

<sup>2</sup>Institute of Plant Science and Resources, Okayama University, Kurashiki 710-0046, Japan

<sup>3</sup>The Graduate University for Advanced Studies [SOKENDAI] Okazaki 444-8585, Japan

Present address

<sup>4</sup>Graduate School of Bioagricultural Sciences, Nagoya University, Chikusa, Nagoya, Japan

\* Corresponding author; fax: (+81) 564 557521, E-mail: tsugane@nibb.ac.jp

**Supplementary Table S1. Phenotypes of T0 generation in complementaion test**

|               |      | Control | pWT | p35S | pBdt |
|---------------|------|---------|-----|------|------|
| Plant nnumber |      | 10      | 8   | 10   | 12   |
| Height        | ~75~ | 10      |     | 1    |      |
| (cM)          | ~65  |         | 6   | 1    | 6    |
|               | ~55  |         | 1   | 1    |      |
|               | ~45  |         | 1   |      | 4    |
|               | ~35  |         | 1*  |      | 2*   |
|               | ~25  |         |     | 7*   |      |

\*Sterile

**Supplementary Table S2. List of primer sequences used in this study**

| Use                  | Name                | Sequence (5' to 3')           |
|----------------------|---------------------|-------------------------------|
| OsmiR156d precursor  | BDT-3F              | TCTCGATTTTCGATGACTCGG         |
| specific primer      | BDT-3R              | GCGAGGACGGGATAGATTTTA         |
| 5'-RACE              | AK073452-R493       | GTAATTTAGTGATTTTGTAAGCC       |
| Vectors construction | AK073452-PstI       | GGGCTGCAGGAGGTACGACCATCACCC   |
|                      | AK073452-SalI       | CCCGTCGACTGGCCGGCTCCGGACTGTTT |
|                      | 35S-EcoRI           | CCCGAATTCATGGAGTCAAAGATTCA    |
|                      | 35S-XhoI            | GGGCTGCAGTCCCCCGTGTTCTCTCC    |
|                      | BDT1-F(-)1616-EcoRI | CCCGAATTCATACCCTTGGTAGCAC     |
|                      | BDT1-R177           | AAGAGAGGTTTTCTTCTTGGATCCG     |
